# Supplementary material for: Efficacy of DNA Vaccines in Protecting Rainbow Trout against VHS and IHN under Intensive Farming Conditions
Source: MDPI journal article supplement (doi:10.3390/vaccines10122062), 2022-12-01
Supplement: s1 [file s1]

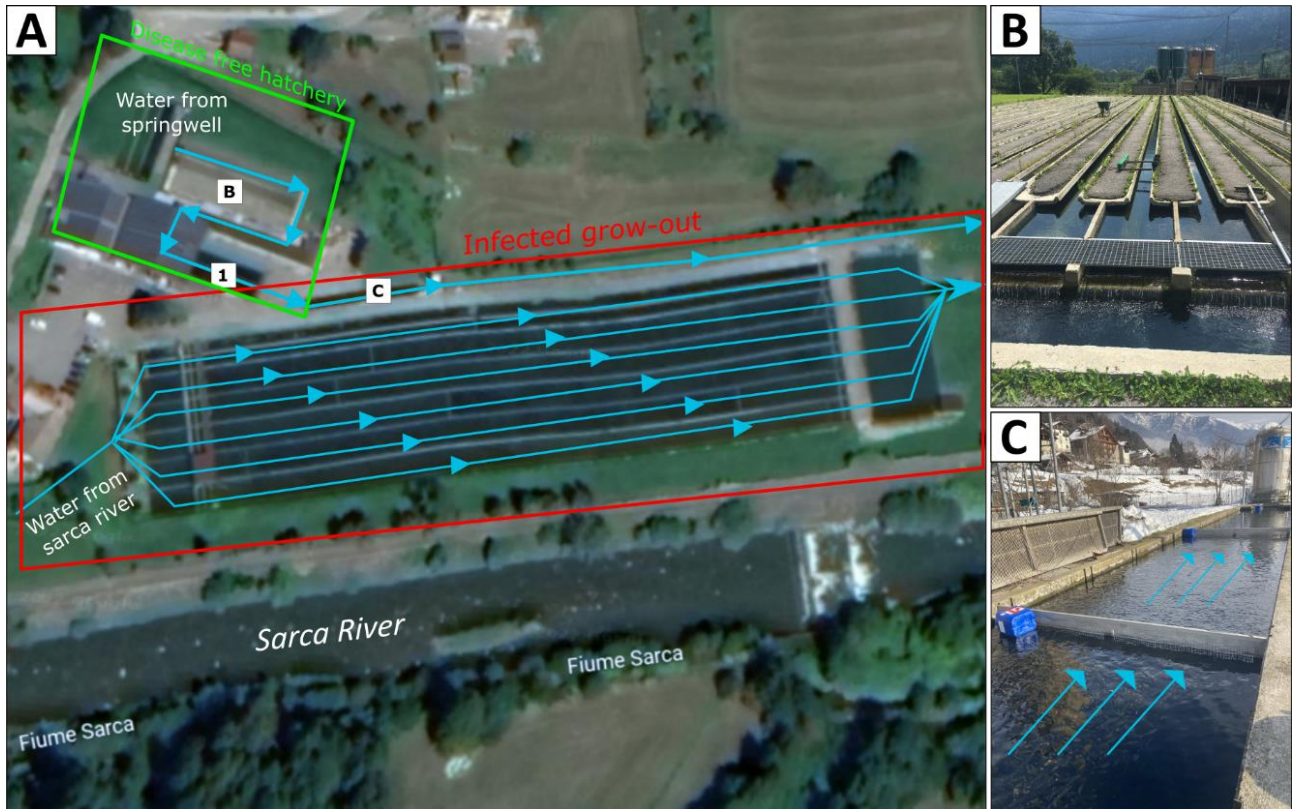

**Figure S1:** Field trial experimental setup. A) layout of the disease free hatchery (green rombold) and infected grow out (red rombold). Water paths are highlighted by the light blue lines. Position of the raceways housing fish destined to the slaughterhouse is reported (1). B) raceways housing experimental groups for 60 dpv in the disease free hatchery. C) Positioning of the experimental groups into the raceways. According to water flow, the mock vaccinated group was positioned first, followed by the group vaccinated against VHS. The VHS and IHN vaccinated group was positioned as last.
